# Supplementary material for: The effectiveness of different attentional foci on the acquisition of sport-specific motor skills in healthy adults: a systematic review with network meta-analysis
Source: PeerJ. 2024 Aug 5;12:e17799. doi: 10.7717/peerj.17799 (PMC11308994; doi:10.7717/peerj.17799)
Supplement: Supplemental Information 3 — studlab: study ID; treat1.long: Label for treatment in group 1 in long format; treat2.long: Label for treatment in group 2 in long format; mean1: mean value in group 1; sd1: standard deviation in group 1; n1: participants in group 1; mean2: mean value in group 2; sd2: standard deviation in group 2; n2: participants in group 2; direction: indicates the direction of the performance assessment; assessment: performance assessment used; TE: treatment effect; seTE: standard error of treatment effect; subgroup: short label for the comparison [file peerj-12-17799-s003.xlsx]

## Sheet: Sheet 1
studlab	treat1.long	treat2.long	mean1	sd1	n1	mean2	sd2	n2	direction	assesment	TE	seTE	subgroup	trials	age	complexity	PEDro
Abedanzadeh 2022	External focus of attention	Internal focus of attention	3.22	0.55	15	3.01	0.76	15	higher=better	badminton short serve	0.31	0.37	EFA - IFA	150	19.56	2	7
Abedanzadeh 2022	External focus of attention	Control	3.22	0.55	15	2.65	0.48	15	higher=better	badminton short serve	1.07	0.39	EFA - C	150	19.56	2	7
Abedanzadeh 2022	Internal focus of attention	Control	3.01	0.76	15	2.65	0.48	15	higher=better	badminton short serve	0.55	0.37	IFA - C	150	19.56	2	7
Abedanzadeh 2022	Internal focus of attention	Holistic focus	3.01	0.76	15	3.28	0.81	15	higher=better	badminton short serve	-0.33	0.37	IFA - HF	150		2	7
Abedanzadeh 2022	Control	Holistic focus	2.65	0.48	15	3.28	0.81	15	higher=better	badminton short serve	-0.92	0.39	C - HF	150		2	7
Abedanzadeh 2022	External focus of attention	Holistic focus	3.22	0.55	15	3.28	0.81	15	higher=better	badminton short serve	-0.08	0.37	EFA - HF	150		2	7
Aiken 2022	External focus of attention	Internal focus of attention	56.67	13.15	27	61.21	11.32	26	lower=better	golf chipping	0.36	0.277	EFA - IFA	80	19.28	2	6
Aiken 2022	External focus of attention	Switching focus	56.67	13.15	27	55.56	12.39	26	lower=better	golf chipping	-0.09	0.2749	EFA - SF	80		2	6
Aiken 2022	Internal focus of attention	Switching focus	61.21	11.32	26	55.56	12.39	26	lower=better	golf chipping	-0.47	0.2814	IFA - SF	80		2	6
Al-Abood 2002	External focus of attention	External focus of attention dynamic	0.23		8	0.12		8	higher=better	basketball (free throws)	0.12	0.5	EFA - EFAD	10	21.3	2	6
Benjaminse 2017	External focus of attention	Internal focus of attention	21.75	2.85	30	19.95	3.55	30	higher=better	basketball (side step cutting)	0.55	0.26	EFA - IFA	105	23.6	6	7
Benjaminse 2017	External focus of attention	Control	21.75	2.85	30	21.15	3.1	30	higher=better	basketball (side step cutting)	0.2	0.26	EFA - C	105	23.6	6	7
Benjaminse 2017	Internal focus of attention	Control	19.95	3.55	30	21.15	3.1	30	higher=better	basketball (side step cutting)	-0.36	0.26	IFA - C	105	23.6	6	7
Land 2014	External focus of attention	Internal focus of attention	458.13	66.44	10	711.42	207.61	10	lower=better	golf putting	1.57	0.53	EFA - IFA	540	26.8	2	7
Makaruk 2019	External focus of attention	Internal focus of attention	89.82	9.13	20	108.77	8.77	20	lower=better	football kick	2.07	0.4	EFA - IFA	12	21.7	4	7
Makaruk 2019	External focus of attention	Control	89.82	9.13	20	107.02	9.02	20	lower=better	football kick	1.86	0.38	EFA - C	12	21.7	4	7
Makaruk 2019	Internal focus of attention	Control	108.77	8.77	20	107.02	9.02	20	lower=better	football kick	-0.19	0.32	IFA - C	12	21.7	4	7
Marchant 2009	External focus of attention	Internal focus of attention	3.97	0.67	40	4.59	0.7	32	lower=better	dart throwing	0.9	0.25	EFA - IFA	100	19.82	2	6
Munzert 2014	External focus of attention	Internal focus of attention	57.8	5.19	15	64.01	7.43	15	lower=better	golf putting	0.94	0.39	EFA - IFA	120		2	7
Poolton 2006a	External focus of attention	Internal focus of attention	8.6		15	8.15		15	higher=better	golf putting	0.11	0.36	EFA - IFA	300	24.1	2	6
Poolton 2006b	External focus of attention	Internal focus of attention	43.96		20	35.18		19	higher=better	golf putting	0.2	0.32	EFA - IFA	300	20.4	2	6
Rostami 2020	External focus of attention	Control	458.66	45.24	16	398.41	40.81	16	higher=better	volleyball (landing after a block)	1.36	0.4	EFA - C	18		7	8
Wulf 1999	External focus of attention	Internal focus of attention	23.57		11	13.64		11	higher=better	golf pitching	2.51	0.58	EFA - IFA	80		2	6
Yamada 2021	External focus of attention	Imagined external focus	211.3	12.78	21	214.78	13	21	higher=better	standing long jump	-0.26	0.31	EFA - IEFA	8	21.74	3	7

## Sheet: original
studlab	treat1.long	treat2.long	mean1	sd1	n1	mean2	sd2	n2	direction	assesment	TE	seTE	subgroup	trials	comments	age	complexity
Abedanzadeh 2022	External focus of attention	Internal focus of attention	3.22	0.55	15	3.01	0.76	15	higher=better	badminton short serve	0.31	0.37	EFA - IFA	150	always direction of firstr group	19.56	2
Abedanzadeh 2022	External focus of attention	Control	3.22	0.55	15	2.65	0.48	15	higher=better	badminton short serve	1.07	0.39	EFA - C	150		19.56	2
Abedanzadeh 2022	Internal focus of attention	Control	3.01	0.76	15	2.65	0.48	15	higher=better	badminton short serve	0.55	0.37	IFA - C	150		19.56	2
Abedanzadeh 2022	Internal focus of attention	Holistic focus	3.01	0.76	15	3.28	0.81	15	higher=better	badminton short serve	-0.33	0.37	IFA - HF	150	MS: Calculated with revman -> reference first group for sign		2
Abedanzadeh 2022	Control	Holistic focus	2.65	0.48	15	3.28	0.81	15	higher=better	badminton short serve	-0.92	0.37	C - HF	150	MS: Calculated with revman -> reference first group for sign		2
Abedanzadeh 2022	External focus of attention	Holistic focus	3.22	0.55	15	3.28	0.81	15	higher=better	badminton short serve	-0.06	0.25	EFA - HF	150	MS: Calculated with revman -> reference first group for sign		2
Aiken 2022	External focus of attention	Internal focus of attention	56.75	1.22	27	61.24	2.1	26	lower=better	golf chipping	2.23	0.52	EFA - IFA	80		19.28	2
Aiken 2022	External focus of attention	Switching focus	56.75	1.22	27	55.49	2.14	26	lower=better	golf chipping	-0.72	0.28	EFA - SF	80	MS: Calculated with revman -> reference first group for sign		2
Aiken 2022	Internal focus of attention	Switching focus	61.23	2.1	26	55.49	2.14	26	lower=better	golf chipping	-2.67	0.39	IFA - SF	80	MS: Calculated with revman -> reference first group for sign		2
Al-Abood 2002	External focus of attention	External focus of attention Dynamic	0.23		8	0.12		8	higher=better	basketball (free throws)	0.12	0.5	EFA - EFAD	10	MS: Calculated with revman -> reference first group for sign	21.3	2
Benjaminse 2017	External focus of attention	Internal focus of attention	21.75	2.85	30	19.95	3.55	30	higher=better	basketball (side step cutting)	0.55	0.26	EFA - IFA	105		23.6	6
Benjaminse 2017	External focus of attention	Control	21.75	2.85	30	21.15	3.1	30	higher=better	basketball (side step cutting)	0.2	0.26	EFA - C	105		23.6	6
Benjaminse 2017	Internal focus of attention	Control	19.95	3.55	30	21.15	3.1	30	higher=better	basketball (side step cutting)	-0.36	0.26	IFA - C	105		23.6	6
Land 2014	External focus of attention	Internal focus of attention	458.13	66.44	10	711.42	207.61	10	lower=better	golf putting	1.57	0.53	EFA - IFA	540		26.8	2
Makaruk 2019	External focus of attention	Internal focus of attention	89.82	9.13	20	108.77	8.77	20	lower=better	football kick	2.07	0.4	EFA - IFA	12		21.7	4
Makaruk 2019	External focus of attention	Control	89.82	9.13	20	107.02	9.02	20	lower=better	football kick	1.86	0.38	EFA - C	12		21.7	4
Makaruk 2019	Internal focus of attention	Control	108.77	8.77	20	107.02	9.02	20	lower=better	football kick	-0.19	0.32	IFA - C	12		21.7	4
Marchant 2009	External focus of attention	Internal focus of attention	3.97	0.67	40	4.59	0.7	32	lower=better	dart throwing	0.9	0.25	EFA - IFA	100		19.82	2
Munzert 2014	External focus of attention	Internal focus of attention	57.8	5.19	15	64.01	7.43	15	lower=better	golf putting	0.94	0.39	EFA - IFA	120	in favour of EFA positive		2
Poolton 2006a	External focus of attention	Internal focus of attention	8.6		15	8.15		15	higher=better	golf putting	0.11	0.36	EFA - IFA	300		24.1	2
Poolton 2006b	External focus of attention	Internal focus of attention	43.96		20	35.18		19	higher=better	golf putting	0.2	0.32	EFA - IFA	300		20.4	2
Rostami 2020	External focus of attention	Control	458.66	45.24	16	398.41	40.81	16	higher=better	volleyball (landing after a block)	1.36	0.4	EFA - C	18	in favour of EFA positive		7
Wulf 1999	External focus of attention	Internal focus of attention	23.57		11	13.64		11	higher=better	golf pitching	2.51	0.58	EFA - IFA	80			2
Yamada 2021	External focus of attention	Imagined external focus	211.3	12.78	21	214.78	13	21	higher=better	standing long jump	-0.26	0.31	EFA - IEFA	8		21.74	3
