# Supplementary material for: The effectiveness of different attentional foci on the acquisition of sport-specific motor skills in healthy adults: a systematic review with network meta-analysis
Source: PeerJ. 2024 Aug 5;12:e17799. doi: 10.7717/peerj.17799 (PMC11308994; doi:10.7717/peerj.17799)
Supplement: Supplemental Information 4 — studlab: study ID; treat1.long: Label for treatment in group 1 in long format; treat2.long: Label for treatment in group 2 in long format; mean1: mean value in group 1; sd1: standard deviation in group 1; n1: participants in group 1; mean2: mean value in group 2; sd2: standard deviation in group 2; n2: participants in group 2; direction: indicates the direction of the performance assessment; assessment: performance assessment used; TE: treatment effect; seTE: standard error of treatment effect; subgroup: short label for the comparison [file peerj-12-17799-s004.xlsx]

## Sheet: Feuil1
studlab	treat1.long	treat2.long	mean1	sd1	n1	mean2	sd2	n2	direction	assesment	TE	seTE	subgroup	trials	age	complexity
Abedanzadeh 2022	External focus of attention	Internal focus of attention	2.38	0.46	15	2.05	0.73	15	higher=better	badminton short serve	0.526234	0.372299	EFA - IFA	150	19.56	2
Abedanzadeh 2022	External focus of attention	Control	2.38	0.46	15	1.87	0.3	15	higher=better	badminton short serve	1.27777	0.405492	EFA - C	150	19.56	2
Abedanzadeh 2022	External focus of attention	Holistic focus	2.38	0.46	15	2.47	0.35	15	higher=better	badminton short serve	-0.214241	0.366343	EFA - HF	150	19.56	2
Abedanzadeh 2022	Internal focus of attention	Control	2.05	0.73	15	1.87	0.3	15	higher=better	badminton short serve	0.313806	0.367707	IFA - C	150	19.56	2
Abedanzadeh 2022	Internal focus of attention	Holistic focus	2.05	0.73	15	2.47	0.35	15	higher=better	badminton short serve	-0.713828	0.378202	IFA - HF	150	19.56	2
Abedanzadeh 2022	Control	Holistic focus	1.87	0.3	15	2.47	0.35	15	higher=better	badminton short serve	-1.79089	0.440917	C - HF	150	19.56	2
Aiken 2022	External focus of attention	Internal focus of attention	62.73	8.9893	27	61.55	9.4842	26	lower=better	golf chipping	-0.125882	0.275063	EFA - IFA	80	19.28	2
Aiken 2022	External focus of attention	Switching focus	62.73	8.9893	27	59.02	15.2971	26	lower=better	golf chipping	-0.292736	0.276349	EFA - SF	80	19.28	2
Aiken 2022	Internal focus of attention	Switching focus	61.55	9.4842	26	59.02	15.2971	26	lower=better	golf chipping	-0.195791	0.278065	IFA - SF	80	19.28	2
Benjaminse 2017	External focus of attention	Internal focus of attention	22.55	3.25	30	20.1	3.6	30	higher=better	basketball (side step cutting)	0.705112	0.266619	EFA - IFA	105	23.6	6
Benjaminse 2017	External focus of attention	Control	22.55	3.25	30	21.9	3.2	30	higher=better	basketball (side step cutting)	0.198925	0.258879	EFA - C	105	23.6	6
Benjaminse 2017	Internal focus of attention	Control	20.1	3.6	30	21.9	3.2	30	higher=better	basketball (side step cutting)	-0.52163	0.262841	IFA - C	105	23.6	6
Land 2014	External focus of attention	Internal focus of attention	462.28	78.9	10	628.37	153.64	10	lower=better	golf putting	1.30237	0.502148	EFA - IFA	540	26.8	2
Munzert 2014	External focus of attention	Internal focus of attention	60.9	10.9	15	73.5	19	15	higher=better	golf putting	0.791468	0.381132	EFA - IFA	120	24.1	2
Poolton 2006a	External focus of attention	Internal focus of attention	9.79		15	9.63		15	higher=better	golf putting	0.2246	0.3665	EFA - IFA	300	20.4	2
Wulf 1999	External focus of attention	Internal focus of attention	22.62		11	13.38		11	higher=better	golf pitching	1.0538	0.4573	EFA - IFA	80		2
