# Supplementary material for: The effectiveness of different attentional foci on the acquisition of sport-specific motor skills in healthy adults: a systematic review with network meta-analysis
Source: PeerJ. 2024 Aug 5;12:e17799. doi: 10.7717/peerj.17799 (PMC11308994; doi:10.7717/peerj.17799)
Supplement: Supplemental Information 5 — studlab: study ID; treat1.long: Label for treatment in group 1 in long format; treat2.long: Label for treatment in group 2 in long format; mean1: mean value in group 1; sd1: standard deviation in group 1; n1: participants in group 1; mean2: mean value in group 2; sd2: standard deviation in group 2; n2: participants in group 2; direction: indicates the direction of the performance assessment; assessment: performance assessment used; TE: treatment effect; seTE: standard error of treatment effect; subgroup: short label for the comparison [file peerj-12-17799-s005.xlsx]

## Sheet: Feuil1
studlab	treat1.long	treat2.long	mean1	sd1	n1	mean2	sd2	n2	direction	assesment	TE	seTE	subgroup	trials	age
Abedanzadeh 2022	External focus of attention	Internal focus of attention	2.1	0.4	15	1.85	0.72	15	higher=better	badminton short serve	0.417633	0.369668	EFA - IFA	150	19.56
Abedanzadeh 2022	External focus of attention	Control	2.1	0.4	15	1.67	0.16	15	higher=better	badminton short serve	1.37334	0.411398	EFA - C	150	19.56
Abedanzadeh 2022	External focus of attention	Holistic focus	2.1	0.4	15	2.57	0.59	15	higher=better	badminton short serve	-0.907237	0.386014	EFA - HF	150	19.56
Abedanzadeh 2022	Internal focus of attention	Control	1.85	0.72	15	1.67	0.16	15	higher=better	badminton short serve	0.335792	0.368077	IFA - C	150	19.56
Abedanzadeh 2022	Internal focus of attention	Holistic focus	1.85	0.72	15	2.57	0.59	15	higher=better	badminton short serve	-1.06426	0.393575	IFA - HF	150	19.56
Abedanzadeh 2022	Control	Holistic focus	1.67	0.16	15	2.57	0.59	15	higher=better	badminton short serve	-2.02572	0.459863	C - HF	150	19.56
Aiken 2022	External focus of attention	Internal focus of attention	65.18	9.1972	27	66.27	10.453	26	lower=better	golf chipping	0.109213	0.27499	EFA - IFA	80	19.28
Aiken 2022	External focus of attention	Switching focus	65.18	9.1972	27	65.55	11.1159	26	lower=better	golf chipping	0.0357976	0.274794	EFA - SF	80	19.28
Aiken 2022	Internal focus of attention	Switching focus	66.27	10.453	26	65.55	11.1159	26	lower=better	golf chipping	-0.0657244	0.277431	IFA - SF	80	19.28
Munzert 2014	External focus of attention	Internal focus of attention	60.8	13.9	15	70.3	27.8	15	lower=better	golf putting	0.420554	0.369731	EFA - IFA	120	24.1
Poolton 2006a	External focus of attention	Internal focus of attention	9.79		15	7.29		15	higher=better	golf putting	0.7418	0.3782	EFA - IFA	300	20.4
Poolton 2006b	External focus of attention	Internal focus of attention	26.96		20	31.78		19	higher=better	golf putting			EFA - IFA	300	20.4
