# Supplementary material for: The effectiveness of different attentional foci on the acquisition of sport-specific motor skills in healthy adults: a systematic review with network meta-analysis
Source: PeerJ. 2024 Aug 5;12:e17799. doi: 10.7717/peerj.17799 (PMC11308994; doi:10.7717/peerj.17799)
Supplement: Supplemental Information 6 — Methodological quality of studies, assessed using PEDro scale. [file peerj-12-17799-s006.xlsx]

## Sheet: Sheet 1
Study	Random.allocation	Concealed.allocation	Baseline.comparability	Subject.blinding	Therapist.blinding	Assessor.blinding	Dropouts	Intention-to-treat	Between-group.comparison	Reporting.statistical.data
Abedanzadeh 2022	Yes	No	Yes	Yes	No	No	Yes	Yes	Yes	Yes
Aiken 2022	Yes	No	Yes	Yes	No	No	Yes	Yes	Yes	No
Al-Abood 2002	Yes	No	Yes	Yes	No	No	Yes	Yes	Yes	No
Benjaminse 2017	Yes	No	Yes	Yes	No	No	Yes	Yes	Yes	Yes
Land 2014	Yes	No	Yes	Yes	No	No	Yes	Yes	Yes	Yes
Makaruk 2019	Yes	No	Yes	Yes	No	No	Yes	Yes	Yes	Yes
Marchant 2009	Yes	No	Yes	No	No	No	Yes	Yes	Yes	Yes
Munzert 2014	Yes	No	Yes	Yes	No	No	Yes	Yes	Yes	Yes
Poolton 2006	Yes	No	Yes	Yes	No	No	Yes	Yes	Yes	No
Rostami 2020	Yes	Yes	Yes	No	No	Yes	Yes	Yes	Yes	Yes
Wulf 1999	Yes	No	Yes	Yes	No	No	Yes	Yes	Yes	No
Yamada 2021	Yes	No	Yes	Yes	No	No	Yes	Yes	Yes	Yes
